# Supplementary material for: Proteome profiling of home-sampled dried blood spots reveals proteins of SARS-CoV-2 infections
Source: PubMed Central journal article supplement (PMC10987641; doi:10.1038/s43856-024-00480-4), 2024-04-02
Supplement: 43856_2024_480_MOESM3_ESM.pdf [file 43856_2024_480_MOESM3_ESM.pdf]

# 1 **Description of Additional Supplementary Files**

2

3 **File Name:** Supplementary Data 1

4 **Description:** Comparison of protein levels between DBS and EDTA plasma samples.

5

6 **File Name:** Supplementary Data 2

7 **Description:** Inter-quartile ranges, ranks, and CVs of protein levels in the three studies.

8

9 **File Name:** Supplementary Data 3

10 **Description:** Cluster and protein-protein correlation analysis.

11

12 **File Name:** Supplementary Data 4

13 **Description:** Association of protein levels with assays, donor traits, and serostatus; protein  
14 median values per serostatus group; tests of heterogeneity of variance; and correlations  
15 between proteins and anti-SARS-CoV-2 antibodies.

16

17 **File Name:** Supplementary Data 5

18 **Description:** Source data

19
